# Supplementary material for: The development of an Amber-compatible organosilane force field for drug-like small molecules
Source: Royal Society of Chemistry journal article supplement (doi:10.1039/d1cp01169c), 2021-01-01
Supplement: d1cp01169c1.pdf [file d1cp01169c1.pdf]

# Supplementary Information

## The Development of an Amber-compatible organosilane force field for drug-like molecules

*Xue Dong, Xinghang Yuan, Zhenlei Song and Qiantao Wang\**

Key Laboratory of Drug-Targeting and Drug Delivery System of the Education Ministry and Sichuan Province, Sichuan Engineering Laboratory for Plant-Sourced Drug and Sichuan Research Center for Drug Precision Industrial Technology, West China School of Pharmacy, Sichuan University, Chengdu, 610041 (P.R. China)

\*Corresponding author: Qiantao Wang ([qwang@scu.edu.cn](mailto:qwang@scu.edu.cn)).

## 1. Supplementary Figures

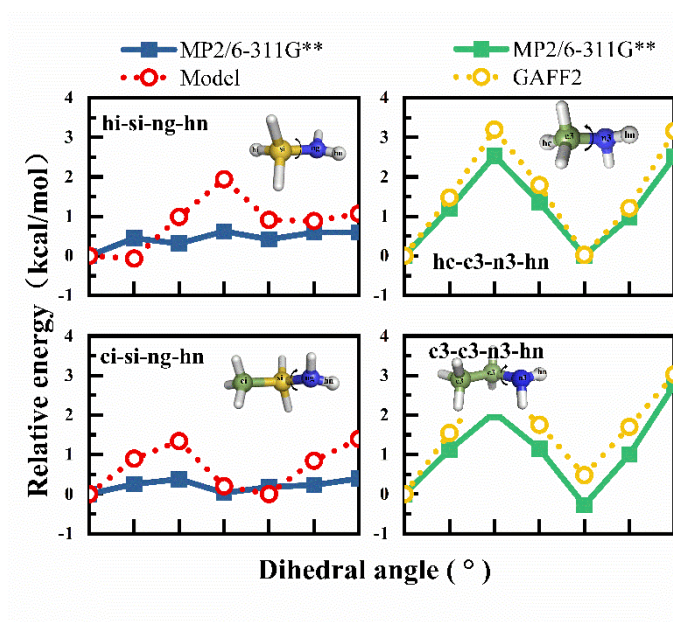

**Figure S1.** Comparison of the rotational energy surface of SiH<sub>3</sub>NH<sub>2</sub> and SiH<sub>2</sub>CH<sub>3</sub>NH<sub>2</sub> with their carbon analogs, CH<sub>3</sub>NH<sub>2</sub> and C<sub>2</sub>H<sub>5</sub>NH<sub>2</sub>.

### set1

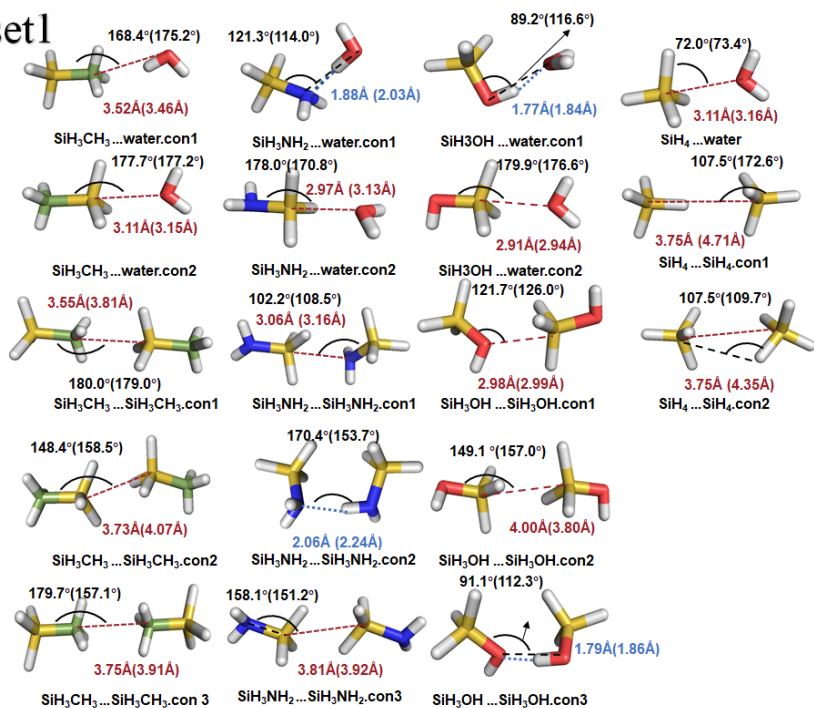

### set2

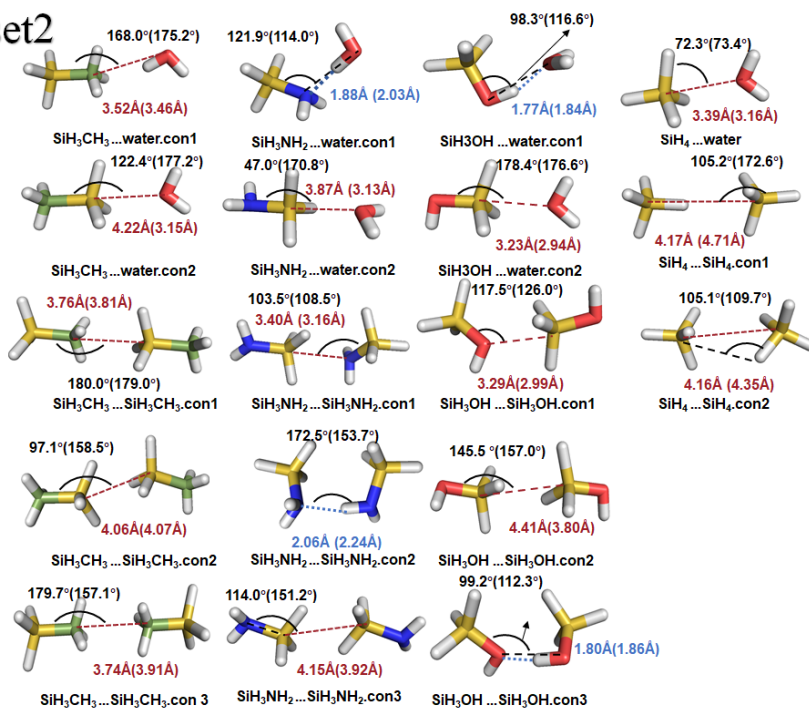

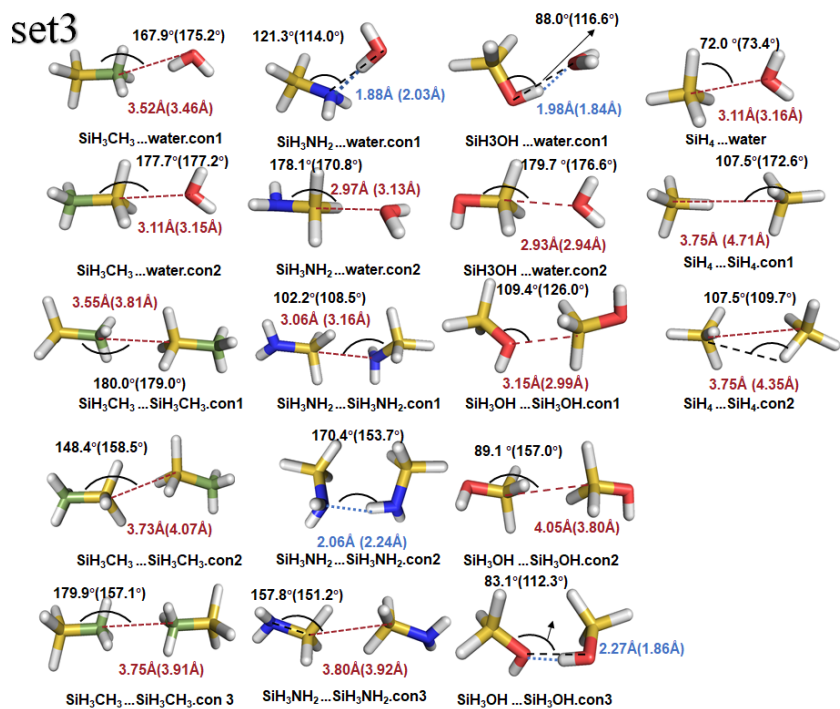

**Figure S2.** Comparison of the intermolecular distance and angle of the force field and QM (in the parenthesis, MP2/cc-pVTZ) optimized structures of 18 pairs. The results of three different vdW parameter sets (namely **set1**, **set2** and **set3** in the figures) were shown.

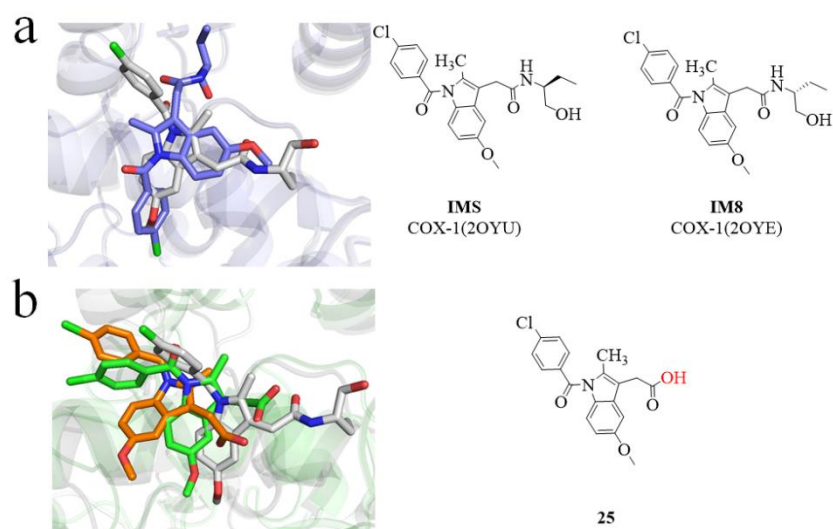

**Figure S3.** The binding pocket of COX proteins may have a large degree of binding flexibility for small molecule binders. Thus, ligand may have more than one binding conformations in COX proteins. a) Two different binding poses of the chiral molecules, **IMS** (2OYU, silver) and **IM8** (2YOE, blue), reported in crystal structures. b) The starting conformations of **25** in con1 (green) and con2 (orange) that have been used in TI calculations, compared with **IMS** (silver) in 2OYU.

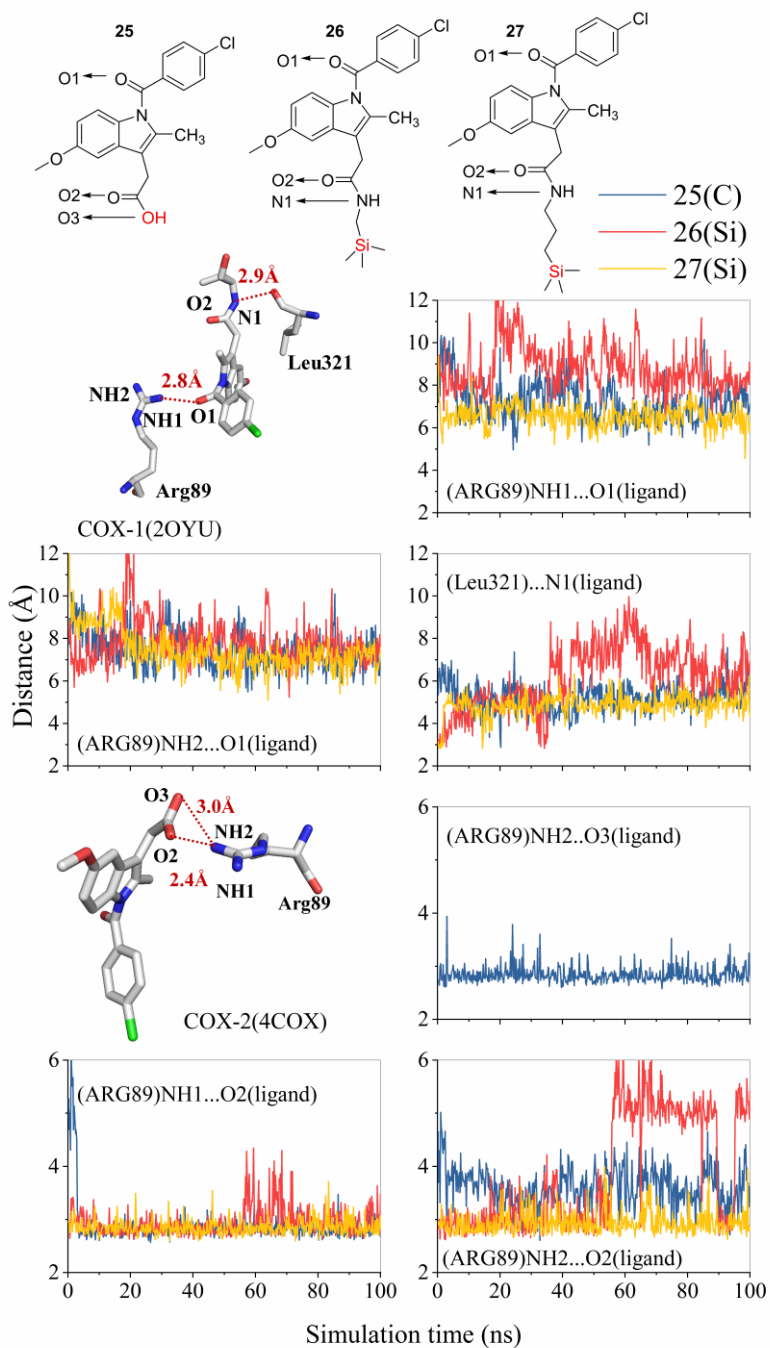

**Figure S4.** The hydrogen bonds between the COX protein (COX-1 in the upper panel and COX-2 in the lower) and ligand (**25**, **26** and **27**) in crystal structures (20YU and 4COX) and during the 100 ns MD simulations.

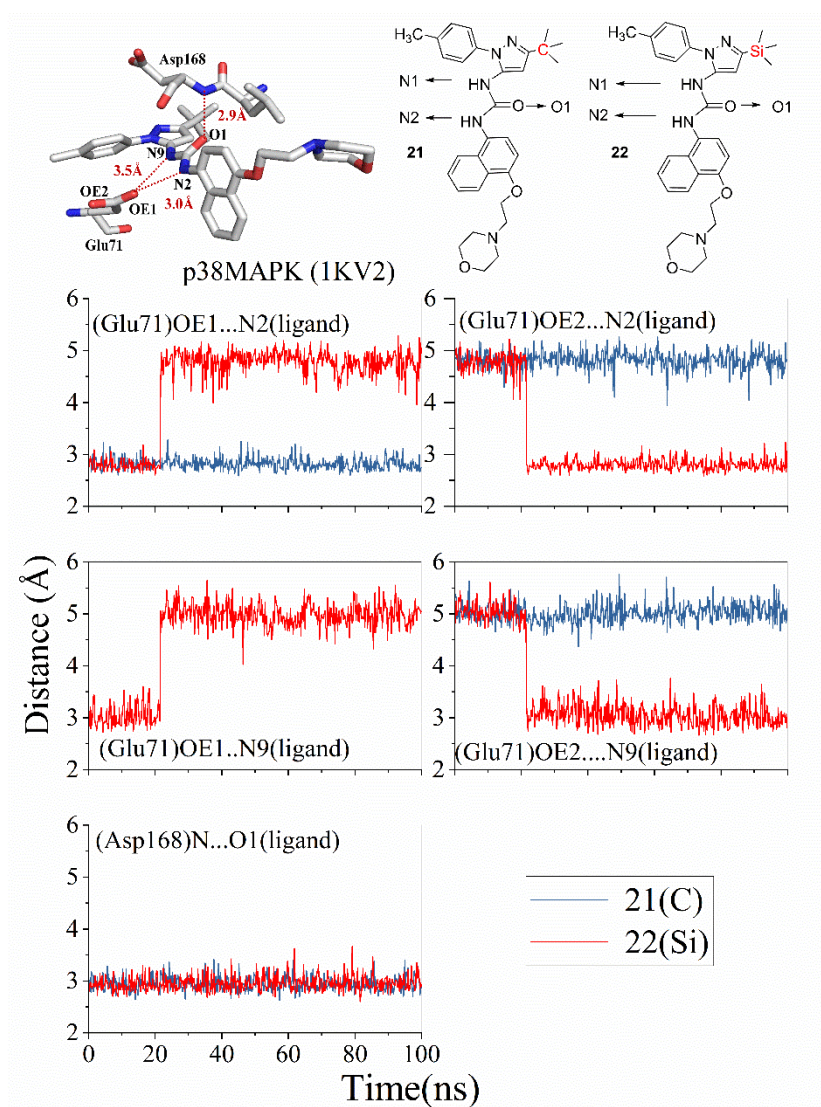

**Figure S5.** The hydrogen bonds between p38 MAPK and the ligand (**21** and **22**) in crystal structure (1KV2) and during the 100 ns MD simulations.

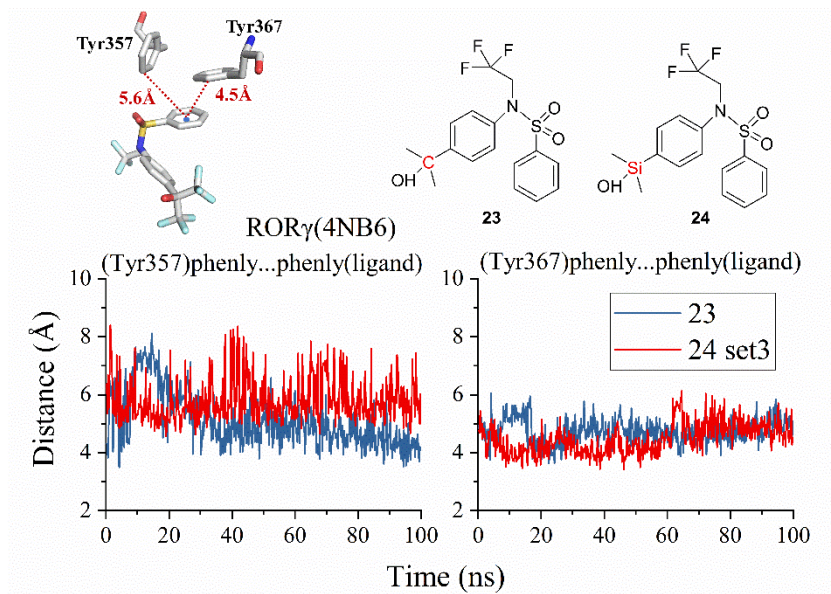

**Figure S6.** The intermolecular distances between ROR $\gamma$  and ligand (**23** and **24**) in crystal structure (4NB6) and during the 100 ns MD simulations.



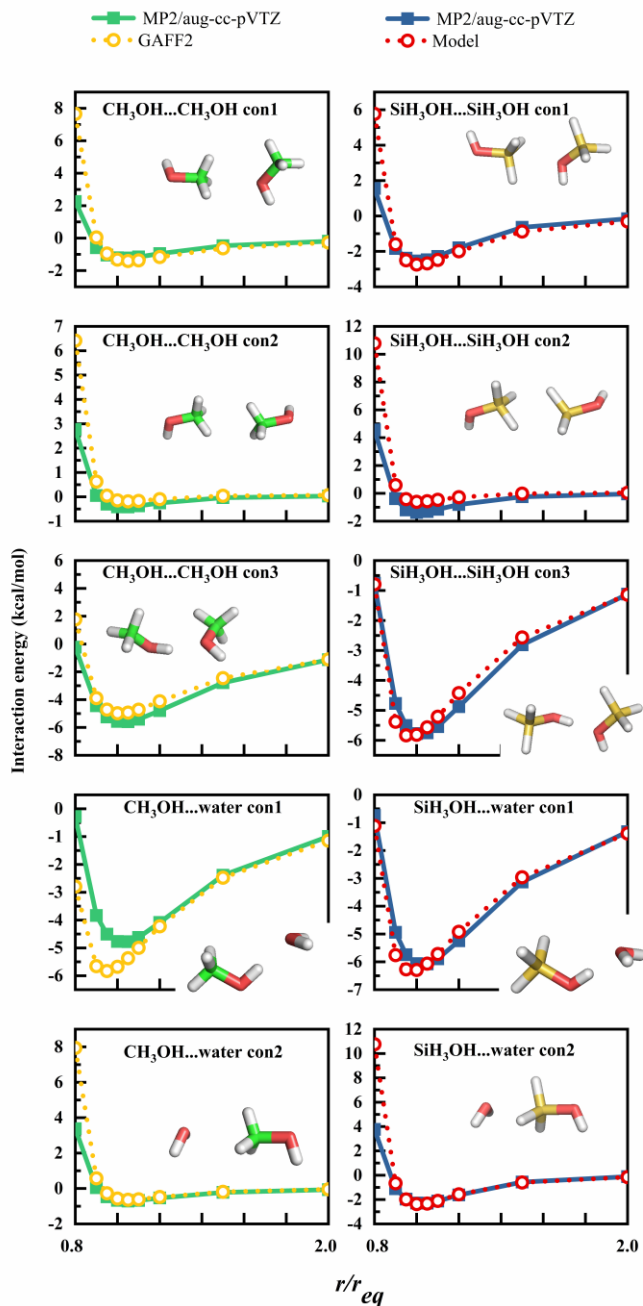

**Figure S7.** The potential energy surfaces of hydroxyl containing carbon (left panel) and silicon (right panel) compounds. The vdW parameters for *oh* (hydroxyl oxygen, 1.820 Å and 0.093 kcal/mol for  $r^*$  and  $\epsilon$ ) in GAFF2 was fitted to obtain a good condensed phase performance by sacrificing the accuracy in gas phase. This might be the reason of the poor performance of the gas phased fitted vdW for *oi* (1.990 Å and 0.032 kcal/mol for  $r^*$  and  $\epsilon$ , hydroxyl oxygen directly bonded to silicon) in binding free energy calculation.

## 2. Supplementary Table

**Table S1.** The optimized force constant and equilibrium bond length involving the newly introduced atom types.

| Bond  | $K_r(\text{kcal/mol } \text{\AA}^{-2})$ | $r_{eq}(\text{\AA})$ |
|-------|-----------------------------------------|----------------------|
| si-ci | 223.29                                  | 1.884                |
| si-ng | 302.02                                  | 1.740                |
| si-oi | 301.70                                  | 1.674                |
| si-hi | 200.20                                  | 1.487                |
| si-si | 410.80                                  | 2.339                |
| si-ca | 42.34                                   | 1.885                |
| si-cc | 38.50                                   | 1.878                |
| si-cd | 38.50                                   | 1.878                |
| ci-hc | 375.92                                  | 1.097                |
| ci-c3 | 232.52                                  | 1.538                |
| ci-n3 | 261.19                                  | 1.465                |
| ci-oh | 293.40                                  | 1.423                |
| ci-h1 | 375.92                                  | 1.097                |
| ci-ca | 250.32                                  | 1.516                |
| oi-ho | 569.60                                  | 0.973                |
| ng-hn | 511.28                                  | 1.019                |
| n-ci  | 263.77                                  | 1.462                |

**Table S2.** The optimized force constant and equilibrium bond angle involving the newly introduced atom types.

| Angle    | $K_{\theta}$ (kcal/mol radian <sup>-2</sup> ) | $\theta_{eq}$ (°) |
|----------|-----------------------------------------------|-------------------|
| hi-si-hi | 37.64                                         | 108.57            |
| ci-si-hi | 23.43                                         | 109.77            |
| ci-si-ci | 31.44                                         | 109.83            |
| ci-si-ng | 12.06                                         | 108.89            |
| ci-si-oi | 3.01                                          | 106.42            |
| ci-si-ca | 9.03                                          | 109.59            |
| ci-si-cc | 74.50                                         | 108.79            |
| ci-si-cd | 74.50                                         | 108.79            |
| ng-si-hi | 35.89                                         | 110.68            |
| oi-si-hi | 45.67                                         | 110.46            |
| si-ci-hc | 36.65                                         | 111.17            |
| si-ci-c3 | 47.94                                         | 114.45            |
| si-ci-n3 | 30.10                                         | 109.11            |
| si-ci-n  | 30.10                                         | 112.105           |
| si-ci-h1 | 12.72                                         | 110.34            |
| si-ci-oh | 58.82                                         | 105.76            |
| si-ci-ca | 48.16                                         | 111.84            |
| si-ca-ca | 9.92                                          | 121.38            |
| si-ca-nb | 5.72                                          | 116.08            |
| si-cc-cc | 7.20                                          | 130.41            |
| si-cd-cd | 7.20                                          | 130.41            |
| si-cc-nc | 3.00                                          | 119.51            |
| si-cc-nd | 3.00                                          | 119.51            |
| si-cd-nc | 3.00                                          | 119.51            |
| si-cd-nd | 3.00                                          | 119.51            |
| si-ng-hn | 31.84                                         | 118.89            |
| si-oi-ho | 20.78                                         | 116.37            |
| si-si-hi | 15.92                                         | 110.40            |
| ng-si-ca | 85.25                                         | 105.26            |
| oi-si-ca | 123.57                                        | 103.70            |
| hc-ci-hc | 38.96                                         | 107.58            |
| hc-ci-c3 | 46.816                                        | 109.80            |
| hc-ci-ca | 47.281                                        | 110.47            |
| hc-c3-ci | 46.816                                        | 109.80            |
| h1-ci-h1 | 38.802                                        | 108.46            |

---

|          |        |        |
|----------|--------|--------|
| h1-ci-n3 | 61.163 | 109.88 |
| h1-ci-oh | 62.54  | 110.26 |
| ci-c3-hc | 46.816 | 109.80 |
| ci-n3-hn | 47.782 | 109.29 |
| ci-oh-ho | 49.027 | 107.26 |
| ci-ca-ca | 65.583 | 120.77 |
| hn-ng-hn | 40.828 | 106.40 |
| ci-n-hn  | 46.147 | 117.68 |
| n -ci-h1 | 61.544 | 108.88 |
| c -n -ci | 65.252 | 120.69 |
| c3-c3-ci | 64.888 | 111.51 |

---

**Table S3.** The optimized dihedral parameters.

| Dihedral    | no. of paths <sup>a</sup> | $v_n/2^b$ | $\gamma^c$ | $n^d$ |
|-------------|---------------------------|-----------|------------|-------|
| X-si-si-X   | 9                         | 0.579     | 0          | 3     |
| X-si-ci-X   | 9                         | 0.705     | 0          | 3     |
| X-si-ng-X   | 6                         | 0.699     | 0          | 3     |
| X-si-oi-X   | 3                         | 0.547     | 0          | 3     |
| X-si-ca-X   | 6                         | 0.000     | 0          | 2     |
| X-si-cc-X   | 6                         | 0.000     | 0          | 2     |
| X-ci-c3-X   | 9                         | 1.156     | 0          | 3     |
| X-ci-n3-X   | 6                         | 1.784     | 0          | 3     |
| X-ci-n -X   | 6                         | 0.000     | 0          | 2     |
| X-ci-oh-X   | 3                         | 0.295     | 0          | 3     |
| X-ci-ca-X   | 6                         | 0.000     | 0          | 2     |
| si-ci-ca-ca | 1                         | 0.400     | 0          | 2     |
| si-ci-n3-hn | 1                         | 1.000     | 0          | 1     |
| si-ci-oh-ho | 1                         | 0.000     | 0          | -3    |
|             | 1                         | 0.700     | 90         | 2     |
| ci-si-ca-nb | 1                         | 0.200     | 0          | 3     |
| ci-si-cc-nd | 1                         | 0.040     | 0          | 3     |
| oi-si-ca-ca | 1                         | -0.090    | 180        | -2    |
|             | 1                         | 1.000     | 0          | 1     |
| oi-si-ca-ca | 1                         | 2.0       | 180        | -3    |
|             | 1                         | 0.2       | 180        | 2     |
| si-ci-n -c  | 1                         | 0.500     | 0          | -3    |
|             | 1                         | 0.300     | 60         | 1     |

<sup>a</sup>Number of bond paths that the total  $v_n/2$  is divided into. <sup>b</sup>Magnitude of torsion in kcal/mol. <sup>c</sup>Phase offset in the degree. <sup>d</sup>The periodicity of the torsion. A negative value is not used in the calculation but signifies more than one component around a given bond.

**Table S4.** Error of the relative rotational energy (kcal/mol) of the model compounds.

| Molecule  | MSE   | MUE  | RMSE |
|-----------|-------|------|------|
| <b>2</b>  | -0.01 | 0.01 | 0.02 |
| <b>3</b>  | -0.46 | 0.51 | 0.63 |
| <b>4</b>  | 0.00  | 0.01 | 0.01 |
| <b>7</b>  | 0.04  | 0.04 | 0.06 |
| <b>8</b>  | -0.39 | 0.54 | 0.66 |
| <b>9</b>  | -0.08 | 0.08 | 0.10 |
| <b>10</b> | 0.02  | 0.02 | 0.03 |
| <b>11</b> | 0.03  | 0.04 | 0.06 |
| <b>12</b> | 0.06  | 0.16 | 0.18 |
| <b>13</b> | 0.06  | 0.18 | 0.21 |
| <b>14</b> | -0.01 | 0.08 | 0.09 |
| <b>15</b> | -0.03 | 0.03 | 0.04 |
| <b>16</b> | 0.03  | 0.08 | 0.10 |
| <b>17</b> | -0.06 | 0.06 | 0.10 |
| <b>18</b> | 0.03  | 0.04 | 0.05 |
| <b>19</b> | -0.06 | 0.09 | 0.11 |
| <b>20</b> | -0.41 | 0.33 | 0.45 |
| Overall   | -0.07 | 0.13 | 0.17 |

**Table S5.** Error of the interaction energy of three sets of vdW parameters at different distance ranges (0.8, 0.9, 0.95, 1.0, 1.05, 1.1, 1.2, 1.5 and 2.0 fold of the equilibrium distance) of 18 molecule pairs.

| Distance | Energy(kcal/mol) |       |       |       |
|----------|------------------|-------|-------|-------|
|          | set1             | set2  | set3  |       |
| 0.8-0.9  |                  |       |       |       |
|          | MSE              | -0.14 | 5.72  | 2.62  |
|          | MUE              | 0.83  | 6.09  | 3.29  |
|          | RMSE             | 1.08  | 11.49 | 7.71  |
| 0.95-1.2 |                  |       |       |       |
|          | MSE              | 0.10  | 0.35  | 0.24  |
|          | MUE              | 0.26  | 0.47  | 0.43  |
|          | RMSE             | 0.34  | 0.76  | 0.97  |
| 1.5-2.0  |                  |       |       |       |
|          | MSE              | 0.04  | 0.01  | -0.01 |
|          | MUE              | 0.07  | 0.06  | 0.09  |
|          | RMSE             | 0.11  | 0.10  | 0.14  |

**Table S6.** The RMSD (Å) of protein (backbone atoms) and ligand (non-hydrogen atoms) during the 100 ns MD simulations.

| Target       |           | GAFF2     |           | set1      |           | set2      |           | set3      |           |
|--------------|-----------|-----------|-----------|-----------|-----------|-----------|-----------|-----------|-----------|
|              |           | Protein   | Ligand    | Protein   | Ligand    | Protein   | Ligand    | Protein   | Ligand    |
| p38 MAPK     | <b>c1</b> | 2.18±0.54 | 1.73±0.42 | N/A       | N/A       | N/A       | N/A       | N/A       | N/A       |
|              | <b>c2</b> | 2.41±0.47 | 2.14±0.38 | N/A       | N/A       | N/A       | N/A       | N/A       | N/A       |
|              | <b>21</b> | 1.90±0.21 | 2.17±0.39 | N/A       | N/A       | N/A       | N/A       | N/A       | N/A       |
|              | <b>22</b> | N/A       | N/A       | 1.97±0.24 | 1.51±0.31 | 1.52±0.18 | 1.28±0.43 | 1.93±0.33 | 1.42±0.27 |
| ROR $\gamma$ | <b>23</b> | 2.54±0.23 | 2.60±0.43 | N/A       | N/A       | N/A       | N/A       | N/A       | N/A       |
|              | <b>24</b> | N/A       | N/A       | 1.47±0.12 | 2.28±0.81 | 1.33±0.13 | 1.99±0.45 | 1.80±0.27 | 2.60±0.43 |
| COX-1        | <b>25</b> | 1.80±0.27 | 2.98±0.31 | N/A       | N/A       | N/A       | N/A       | N/A       | N/A       |
|              | <b>26</b> | N/A       | N/A       | 2.63±0.19 | 4.25±0.70 | 2.28±0.21 | 3.43±0.53 | 2.30±0.23 | 3.90±0.85 |
|              | <b>27</b> | N/A       | N/A       | 2.41±0.23 | 5.37±1.11 | 2.48±0.21 | 6.97±0.97 | 2.49±0.21 | 4.24±0.44 |
| COX-2        | <b>25</b> | 2.12±0.3  | 1.25±0.34 | N/A       | N/A       | N/A       | N/A       | N/A       | N/A       |
|              | <b>26</b> | N/A       | N/A       | 2.11±0.19 | 2.18±0.27 | 2.28±0.18 | 2.25±0.29 | 2.12±0.26 | 2.19±0.27 |
|              | <b>27</b> | N/A       | N/A       | 1.98±0.16 | 2.01±0.31 | 2.01±0.18 | 1.74±0.22 | 2.04±0.28 | 1.93±0.26 |
| AChE         | <b>31</b> | 1.72±0.20 | 4.39±0.99 | N/A       | N/A       | N/A       | N/A       | N/A       | N/A       |
|              | <b>32</b> | N/A       | N/A       | 1.44±0.25 | 2.71±0.94 | 1.17±0.09 | 4.42±2.51 | 1.65±0.17 | 3.39±0.79 |
|              | <b>33</b> | 1.65±0.20 | 4.00±1.40 | N/A       | N/A       | N/A       | N/A       | N/A       | N/A       |
|              | <b>34</b> | N/A       | N/A       | 1.36±0.16 | 4.03±1.52 | 1.60±0.16 | 5.79±2.14 | 1.32±0.09 | 5.44±1.85 |



**Table S7.** List of the literature reported experimental activity of the compounds.

| Target   | Ligand                                | Biological activity (M)                   |
|----------|---------------------------------------|-------------------------------------------|
| p38 MAPK | <b>21</b> (BIRB-796) <sup>1</sup>     | IC <sub>50</sub> (9×10 <sup>-9</sup> )    |
|          | <b>22</b> <sup>1</sup>                | IC <sub>50</sub> (7×10 <sup>-9</sup> )    |
|          | <b>c1</b> <sup>2</sup>                | IC <sub>50</sub> (>7×10 <sup>-6</sup> )   |
|          | <b>c2</b> <sup>2</sup>                | IC <sub>50</sub> (3.3×10 <sup>-7</sup> )  |
|          | <b>c3</b> <sup>2</sup>                | IC <sub>50</sub> (1.3×10 <sup>-8</sup> )  |
| RORγ     | <b>23</b> (T091317) <sup>3</sup>      | IC <sub>50</sub> (>3×10 <sup>-5</sup> )   |
|          | <b>24</b> <sup>3</sup>                | IC <sub>50</sub> (1.1×10 <sup>-5</sup> )  |
| COX-1    | <b>25</b> (indomethacin) <sup>4</sup> | IC <sub>50</sub> (4.7×10 <sup>-8</sup> )  |
|          | <b>26</b> <sup>4</sup>                | IC <sub>50</sub> (2.7×10 <sup>-6</sup> )  |
|          | <b>27</b> <sup>4</sup>                | IC <sub>50</sub> (>1.0×10 <sup>-5</sup> ) |
|          | <b>25</b> (indomethacin) <sup>5</sup> | IC <sub>50</sub> (0.05×10 <sup>-6</sup> ) |
|          | <b>c4</b> <sup>5</sup>                | IC <sub>50</sub> (>6.6×10 <sup>-5</sup> ) |
| COX-2    | <b>25</b> (indomethacin) <sup>4</sup> | IC <sub>50</sub> (5.9*10 <sup>-7</sup> )  |
|          | <b>26</b> <sup>4</sup>                | IC <sub>50</sub> (3.9×10 <sup>-7</sup> )  |
|          | <b>27</b> <sup>4</sup>                | IC <sub>50</sub> (2.1*10 <sup>-7</sup> )  |
|          | <b>25</b> (indomethacin) <sup>5</sup> | IC <sub>50</sub> (0.75×10 <sup>-6</sup> ) |
|          | <b>c4</b> <sup>5</sup>                | IC <sub>50</sub> (0.05×10 <sup>-6</sup> ) |
| AChE     | <b>31</b> <sup>6</sup>                | Ki (2.9×10 <sup>-8</sup> )                |
|          | <b>32</b> (MDL73105) <sup>7</sup>     | Ki (6.8×10 <sup>-9</sup> )                |
|          | <b>33</b> <sup>8</sup>                | Ki (0.4×10 <sup>-9</sup> )                |
|          | <b>34</b> (MDL73745) <sup>7</sup>     | Ki (4.7×10 <sup>-11</sup> )               |

**Table S8.** The binding free energy difference calculated using parameter **set1** and **set2**.

| Protein<br>Ligand <b>A</b> → <b>B</b> | Expt. <sup>a</sup> | Calculation |            |             |            |
|---------------------------------------|--------------------|-------------|------------|-------------|------------|
|                                       |                    | <b>set1</b> |            | <b>set2</b> |            |
|                                       |                    | con1        | con2       | con1        | con2       |
| p38 MAPK                              |                    |             |            |             |            |
| <b>21(C)</b> → <b>22(Si)</b>          | -0.15              | -1.64±0.35  | -2.03±0.19 | -2.54±0.14  | -1.92±0.22 |
| ROR $\gamma$                          |                    |             |            |             |            |
| <b>23(C)</b> → <b>24(Si)</b>          | <-0.60             | 5.23±0.20   | 5.26±0.38  | 2.24±0.25   | 2.08±0.10  |
| COX-1                                 |                    |             |            |             |            |
| <b>25(C)</b> → <b>26(Si)</b>          | 2.41               | 5.95±0.49   | -0.72±1.41 | 7.95±0.03   | -7.37±0.26 |
| <b>26(Si)</b> → <b>27(Si)</b>         | >0.78              | -0.24±0.11  | 0.09±0.24  | -0.69±0.62  | -5.74±0.54 |
| COX-2                                 |                    |             |            |             |            |
| <b>25(C)</b> → <b>26(Si)</b>          | -0.25              | 0.27±0.83   | -2.16±0.10 | 0.37±0.45   | -2.50±0.47 |
| <b>26(Si)</b> → <b>27(Si)</b>         | -0.37              | -0.79±0.01  | -4.13±0.26 | 2.08±0.12   | -1.36±0.10 |
| AChE                                  |                    |             |            |             |            |
| <b>31(C)</b> → <b>32(Si)</b>          | -0.86              | 0.07±0.32   | -0.52±0.14 | -0.71±0.38  | -0.39±0.54 |
| <b>33(C)</b> → <b>34(Si)</b>          | -1.28              | 0.37±0.16   | -0.36±0.03 | -0.27±0.09  | -1.09±0.18 |
| MSE <sup>b</sup>                      |                    | 0.54        | -1.19      | 1.09        | -2.25      |
| MUE                                   |                    | 1.27        | 1.65       | 2.06        | 3.08       |
| RMSE                                  |                    | 1.59        | 2.03       | 2.60        | 4.40       |

<sup>a</sup>The experimental free energy values were obtained based on the IC<sub>50</sub> or K<sub>i</sub> values reported in the same study for each protein system (see Table S7 for details and references), to minimize the potential error due to different experiment conditions. <sup>b</sup>As some experimental values are not definitive, the actual errors would be larger than the listed.

**Table S9.** The convergence of the TI calculation using parameter **set3**.

| Protein | Ligand <b>A</b> → <b>B</b>                              | Expt.  | Calculation        |                    |                    |                    |                    |                    |                    |                    | Change in the last two cumulative averages <sup>f</sup> | S.D. of each ns |
|---------|---------------------------------------------------------|--------|--------------------|--------------------|--------------------|--------------------|--------------------|--------------------|--------------------|--------------------|---------------------------------------------------------|-----------------|
|         |                                                         |        | 1 <sup>st</sup> ns | 2 <sup>rd</sup> ns | 3 <sup>th</sup> ns | 4 <sup>th</sup> ns | 5 <sup>th</sup> ns | 6 <sup>th</sup> ns | 7 <sup>th</sup> ns | 8 <sup>th</sup> ns |                                                         |                 |
|         |                                                         |        | con1               |                    |                    |                    |                    |                    |                    |                    |                                                         |                 |
| p38MAPK | <b>21(C)</b> → <b>22(Si)</b><br>difference <sup>a</sup> | -0.15  | -1.69              | -1.80              | N/A                                                     | 0.05            |
|         | <b>c1(C)</b> → <b>c2(C)</b><br>difference               | <-1.82 | -3.80              | -3.14              | -3.06              | -2.99              | N/A                | N/A                | N/A                | N/A                | 0.09                                                    | 0.32            |
|         | <b>c2(C)</b> → <b>c3(C)</b><br>difference               | -1.93  | -0.97              | -1.03              | N/A                                                     | -0.06           |
|         | <b>c1(C)</b> → <b>c3(C)</b><br>difference               | <-3.75 | -4.69              | -4.52              | N/A                                                     | 0.16            |
| RORγ    | <b>23(C)</b> → <b>24(Si)</b><br>difference              | <-0.60 | 0.51               | 0.52               | N/A                                                     | 0.01            |
|         |                                                         |        |                    | 0.02               | 0.01               | -0.06              | N/A                | N/A                | N/A                | N/A                |                                                         |                 |
| COX-1   | <b>25(C)</b> → <b>26(Si)</b><br>difference              | 2.41   | 3.65               | 3.59               | N/A                                                     | -0.06           |
|         | <b>26(Si)</b> → <b>27(Si)</b><br>difference             | >0.78  | -1.04              | -1.56              | -0.64              | -1.91              | -1.86              | -1.86              | N/A                | N/A                | -0.08                                                   | 0.48            |
|         | <b>25(C)</b> → <b>27(Si)</b><br>difference              | >3.19  | 5.05               | 3.76               | 2.55               | 2.83               | N/A                | N/A                | N/A                | N/A                | -0.24                                                   | 0.98            |
|         | <b>25(C)</b> → <b>c4(C)</b><br>difference               | >4.28  | 0.99               | 1.57               | 3.23               | 1.38               | 1.01               | N/A                | N/A                | N/A                | -0.16                                                   | 0.83            |



|       |                      |       |       |       |       |       |       |       |     |     |      |       |
|-------|----------------------|-------|-------|-------|-------|-------|-------|-------|-----|-----|------|-------|
|       | difference           |       |       | -0.35 | N/A   | N/A   | N/A   | N/A   | N/A | N/A |      |       |
|       | <b>25(C)→27(Si)</b>  | >3.19 | 1.04  | 1.86  | 2.50  | 0.20  | 1.59  | 2.06  | N/A | N/A | 0.10 | 0.75  |
|       | difference           |       |       | 0.82  | 0.64  | -2.30 | 1.39  | 0.47  | N/A | N/A |      |       |
| COX-2 | <b>25(C)→26(Si)</b>  | -0.25 | -3.42 | -2.77 | -2.39 | -2.44 | N/A   | N/A   | N/A | N/A | 0.10 | 0.41  |
|       | difference           |       |       | 0.65  | 0.37  | -0.05 | N/A   | N/A   | N/A | N/A |      |       |
|       | <b>26(Si)→27(Si)</b> | -0.37 | -1.94 | -2.40 | -1.69 | -3.02 | -2.11 | -2.14 | N/A | N/A | 0.01 | 0.42  |
|       | difference           |       |       | -0.47 | 0.72  | -1.33 | 0.91  | -0.04 | N/A | N/A |      |       |
|       | <b>25(C)→27(Si)</b>  | -0.62 | -1.44 | 0.54  | 2.06  | 1.61  | N/A   | N/A   | N/A | N/A | 0.31 | 1.35  |
|       | difference           |       |       | 1.98  | 1.53  | -0.46 | N/A   | N/A   | N/A | N/A |      |       |
| AChE  | <b>31(C)→32(Si)</b>  | -0.86 | -0.50 | -0.88 | N/A   | N/A   | N/A   | N/A   | N/A | N/A | N/A  | -0.39 |
|       | difference           |       |       | -0.39 | N/A   | N/A   | N/A   | N/A   | N/A | N/A |      |       |
|       | <b>33(C)→34(Si)</b>  | -1.28 | 1.08  | 1.36  | N/A   | N/A   | N/A   | N/A   | N/A | N/A | N/A  | 0.28  |
|       | difference           |       |       | 0.28  | N/A   | N/A   | N/A   | N/A   | N/A | N/A |      |       |

<sup>a</sup>All the differences were calculated as the difference between the n<sup>th</sup> and (n-1)<sup>th</sup> nanosecond results.

**Table S10.** Atom types and atomic AM1-BCC charges for the model compounds (**1-20**).

| Compound                                                                                        | Atom | Type | AM1-BCC charge |
|-------------------------------------------------------------------------------------------------|------|------|----------------|
| <b>1</b><br>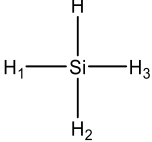   | Si   | si   | 0.5288         |
|                                                                                                 | H    | hi   | -0.1322        |
|                                                                                                 | H1   | hi   | -0.1322        |
|                                                                                                 | H2   | hi   | -0.1322        |
|                                                                                                 | H3   | hi   | -0.1322        |
| <b>2</b><br>   | Si   | si   | 0.5806         |
|                                                                                                 | H    | hi   | -0.1602        |
|                                                                                                 | H1   | hi   | -0.1602        |
|                                                                                                 | H2   | hi   | -0.1602        |
|                                                                                                 | C    | ci   | -0.2566        |
|                                                                                                 | H3   | hc   | 0.0517         |
|                                                                                                 | H4   | hc   | 0.0517         |
|                                                                                                 | H5   | hc   | 0.0517         |
| <b>3</b><br>   | Si   | si   | 0.8609         |
|                                                                                                 | H    | hi   | -0.2050        |
|                                                                                                 | H1   | hi   | -0.2050        |
|                                                                                                 | H2   | hi   | -0.2050        |
|                                                                                                 | N    | ng   | -1.0309        |
|                                                                                                 | H3   | hn   | 0.3926         |
|                                                                                                 | H4   | hn   | 0.3926         |
| <b>4</b><br> | Si   | si   | 0.9693         |
|                                                                                                 | H    | hi   | -0.1982        |
|                                                                                                 | H1   | hi   | -0.1982        |
|                                                                                                 | H2   | hi   | -0.1982        |
|                                                                                                 | O    | oi   | -0.7942        |
|                                                                                                 | H3   | ho   | 0.4190         |
| <b>5</b><br> | Si   | si   | 0.6124         |
|                                                                                                 | H    | hi   | -0.1852        |
|                                                                                                 | H1   | hi   | -0.1852        |
|                                                                                                 | C1   | ci   | -0.2721        |
|                                                                                                 | H5   | hc   | 0.0504         |
|                                                                                                 | H6   | hc   | 0.0504         |
|                                                                                                 | H7   | hc   | 0.0504         |
|                                                                                                 | C    | ci   | -0.2721        |
|                                                                                                 | H2   | hc   | 0.0504         |
|                                                                                                 | H3   | hc   | 0.0504         |
|                                                                                                 | H4   | hc   | 0.0504         |
| <b>6</b><br> | Si   | si   | 0.6252         |
|                                                                                                 | H    | hi   | -0.2092        |
|                                                                                                 | C1   | ci   | -0.2851        |
|                                                                                                 | H4   | hc   | 0.0490         |
|                                                                                                 | H5   | hc   | 0.0490         |
|                                                                                                 | H6   | hc   | 0.0490         |
|                                                                                                 | C2   | ci   | -0.2851        |
|                                                                                                 | H7   | hc   | 0.0490         |
|                                                                                                 | H8   | hc   | 0.0490         |

|           |  |     |    |         |
|-----------|--|-----|----|---------|
|           |  | H8  | hc | 0.0490  |
|           |  | H9  | hc | 0.0490  |
|           |  | C   | ci | -0.2851 |
|           |  | H1  | hc | 0.0490  |
|           |  | H2  | hc | 0.0490  |
|           |  | H3  | hc | 0.0490  |
| <b>7</b>  |  | Si  | si | 0.6220  |
|           |  | C1  | ci | -0.2961 |
|           |  | H3  | hc | 0.0467  |
|           |  | H4  | hc | 0.0467  |
|           |  | H5  | hc | 0.0467  |
|           |  | C2  | ci | -0.2961 |
|           |  | H6  | hc | 0.0467  |
|           |  | H7  | hc | 0.0467  |
|           |  | H8  | hc | 0.0467  |
|           |  | C3  | ci | -0.2961 |
|           |  | H9  | hc | 0.0467  |
|           |  | H10 | hc | 0.0467  |
|           |  | H11 | hc | 0.0467  |
|           |  | C   | ci | -0.2961 |
|           |  | H   | hc | 0.0467  |
|           |  | H1  | hc | 0.0467  |
|           |  | H2  | hc | 0.0467  |
| <b>8</b>  |  | C   | ci | -0.3181 |
|           |  | H2  | hc | 0.0477  |
|           |  | H3  | hc | 0.0477  |
|           |  | H4  | hc | 0.0477  |
|           |  | Si  | si | 0.8697  |
|           |  | H   | hi | -0.2192 |
|           |  | H1  | hi | -0.2192 |
|           |  | N   | ng | -1.0369 |
|           |  | H5  | hn | 0.3898  |
|           |  | H6  | hn | 0.3898  |
| <b>9</b>  |  | Si  | si | 0.9531  |
|           |  | H   | hi | -0.2312 |
|           |  | H1  | hi | -0.2312 |
|           |  | O   | oi | -0.7877 |
|           |  | H5  | ho | 0.4170  |
|           |  | C   | ci | -0.3021 |
|           |  | H2  | hc | 0.0604  |
|           |  | H3  | hc | 0.0604  |
|           |  | H4  | hc | 0.0604  |
| <b>10</b> |  | Si  | si | 0.2726  |
|           |  | H3  | hi | -0.0912 |
|           |  | H4  | hi | -0.0912 |
|           |  | H5  | hi | -0.0912 |
|           |  | Si1 | si | 0.2726  |
|           |  | H   | hi | -0.0912 |
|           |  | H1  | hi | -0.0912 |
|           |  | H2  | hi | -0.0912 |

|           |    |         |    |         |
|-----------|----|---------|----|---------|
| <b>11</b> |    | C       | ci | -0.2944 |
|           |    | H       | hc | 0.0469  |
|           |    | H1      | hc | 0.0469  |
|           |    | H2      | hc | 0.0469  |
|           |    | Si      | si | 0.6170  |
|           |    | C1      | ci | -0.2944 |
|           |    | H3      | hc | 0.0469  |
|           |    | H4      | hc | 0.0469  |
|           |    | H5      | hc | 0.0469  |
|           |    | C2      | ci | -0.2944 |
|           |    | H6      | hc | 0.0469  |
|           |    | H7      | hc | 0.0469  |
|           |    | H8      | hc | 0.0469  |
| C3        | ci | -0.2724 |    |         |
| H9        | hc | 0.0517  |    |         |
| H10       | hc | 0.0517  |    |         |
| C4        | c3 | -0.0761 |    |         |
| H11       | hc | 0.0294  |    |         |
| H12       | hc | 0.0294  |    |         |
| H13       | hc | 0.0294  |    |         |
| <b>12</b> |    | C       | ci | -0.3001 |
|           |    | H       | hc | 0.0487  |
|           |    | H1      | hc | 0.0487  |
|           |    | H2      | hc | 0.0487  |
|           |    | Si      | si | 0.6470  |
|           |    | C1      | ci | -0.3001 |
|           |    | H3      | hc | 0.0487  |
|           |    | H4      | hc | 0.0487  |
|           |    | H5      | hc | 0.0487  |
|           |    | C2      | ci | -0.3001 |
|           |    | H6      | hc | 0.0487  |
|           |    | H7      | hc | 0.0487  |
|           |    | H8      | hc | 0.0487  |
| C3        | ci | -0.0342 |    |         |
| H9        | h1 | 0.0317  |    |         |
| H10       | h1 | 0.0317  |    |         |
| N         | n3 | -0.8938 |    |         |
| H11       | hn | 0.3388  |    |         |
| H12       | hn | 0.3388  |    |         |
| <b>13</b> |    | C       | ci | -0.3021 |
|           |    | H       | hc | 0.0509  |
|           |    | H1      | hc | 0.0509  |
|           |    | H2      | hc | 0.0509  |
|           |    | Si      | si | 0.6630  |
|           |    | C1      | ci | -0.3021 |
|           |    | H3      | hc | 0.0509  |
|           |    | H4      | hc | 0.0509  |
|           |    | H5      | hc | 0.0509  |
|           |    | C2      | ci | -0.3021 |
|           |    | H6      | hc | 0.0509  |
|           |    | H7      | hc | 0.0509  |



|           |                                                                                     |     |    |         |
|-----------|-------------------------------------------------------------------------------------|-----|----|---------|
|           |                                                                                     | H8  | hc | 0.0509  |
|           |                                                                                     | C3  | ci | -0.0556 |
|           |                                                                                     | H9  | h1 | 0.0227  |
|           |                                                                                     | H10 | h1 | 0.0227  |
|           |                                                                                     | O   | oh | -0.5898 |
|           |                                                                                     | H11 | ho | 0.3870  |
| <b>14</b> | 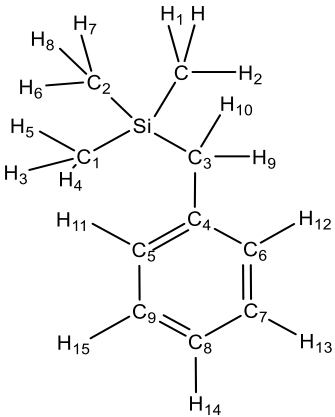   | C   | ci | -0.2978 |
|           |                                                                                     | H   | hc | 0.0495  |
|           |                                                                                     | H1  | hc | 0.0495  |
|           |                                                                                     | H2  | hc | 0.0495  |
|           |                                                                                     | Si  | si | 0.6200  |
|           |                                                                                     | C1  | ci | -0.2978 |
|           |                                                                                     | H3  | hc | 0.0495  |
|           |                                                                                     | H4  | hc | 0.0495  |
|           |                                                                                     | H5  | hc | 0.0495  |
|           |                                                                                     | C2  | ci | -0.2978 |
|           |                                                                                     | H6  | hc | 0.0495  |
|           |                                                                                     | H7  | hc | 0.0495  |
|           |                                                                                     | H8  | hc | 0.0495  |
|           |                                                                                     | C3  | ci | -0.2241 |
|           |                                                                                     | H9  | hc | 0.0617  |
|           |                                                                                     | H10 | hc | 0.0617  |
|           |                                                                                     | C4  | ca | -0.0493 |
|           |                                                                                     | C6  | ca | -0.1400 |
|           |                                                                                     | C7  | ca | -0.1240 |
|           |                                                                                     | C8  | ca | -0.1400 |
|           |                                                                                     | H14 | ha | 0.1290  |
|           |                                                                                     | H13 | ha | 0.1290  |
|           |                                                                                     | H12 | ha | 0.1290  |
|           |                                                                                     | C5  | ca | -0.1400 |
|           |                                                                                     | H11 | ha | 0.1290  |
|           |                                                                                     | C9  | ca | -0.1240 |
|           |                                                                                     | H15 | ha | 0.1290  |
| <b>15</b> |  | C   | ca | -0.2422 |
|           |                                                                                     | Si  | si | 0.6422  |
|           |                                                                                     | C6  | ci | -0.2968 |
|           |                                                                                     | H5  | hc | 0.0478  |
|           |                                                                                     | H6  | hc | 0.0478  |
|           |                                                                                     | H7  | hc | 0.0478  |
|           |                                                                                     | C7  | ci | -0.2968 |
|           |                                                                                     | H8  | hc | 0.0478  |
|           |                                                                                     | H9  | hc | 0.0478  |
|           |                                                                                     | H10 | hc | 0.0478  |
|           |                                                                                     | C8  | ci | -0.2968 |
|           |                                                                                     | H11 | hc | 0.0478  |
|           |                                                                                     | H12 | hc | 0.0478  |
|           |                                                                                     | H13 | hc | 0.0478  |
|           |                                                                                     | C1  | ca | -0.0900 |
|           |                                                                                     | H   | ha | 0.1265  |
|           |                                                                                     | C2  | ca | -0.1425 |
|           |                                                                                     | H1  | ha | 0.1290  |

|           |  |     |    |         |
|-----------|--|-----|----|---------|
|           |  | C3  | ca | -0.1130 |
|           |  | H2  | ha | 0.1290  |
|           |  | C4  | ca | -0.1425 |
|           |  | H3  | ha | 0.1290  |
|           |  | C5  | ca | -0.0900 |
|           |  | H4  | ha | 0.1265  |
| <b>16</b> |  | C   | ca | -0.0875 |
|           |  | H   | ha | 0.1255  |
|           |  | C1  | ca | -0.2742 |
|           |  | Si  | si | 0.8595  |
|           |  | C6  | ci | -0.3226 |
|           |  | H5  | hc | 0.0477  |
|           |  | H6  | hc | 0.0477  |
|           |  | H7  | hc | 0.0477  |
|           |  | N   | ng | -1.0509 |
|           |  | H8  | hn | 0.3868  |
|           |  | H9  | hn | 0.3868  |
|           |  | C7  | ci | -0.3226 |
|           |  | H10 | hc | 0.0477  |
|           |  | H11 | hc | 0.0477  |
|           |  | H12 | hc | 0.0477  |
|           |  | C2  | ca | -0.0875 |
|           |  | H1  | ha | 0.1255  |
|           |  | C3  | ca | -0.1450 |
|           |  | H2  | ha | 0.1270  |
|           |  | C4  | ca | -0.1140 |
|           |  | H3  | ha | 0.1270  |
|           |  | C5  | ca | -0.1450 |
|           |  | H4  | ha | 0.1270  |
| <b>17</b> |  | C   | ca | -0.2752 |
|           |  | Si  | si | 0.9519  |
|           |  | C6  | ci | -0.3501 |
|           |  | H5  | hc | 0.0544  |
|           |  | H6  | hc | 0.0544  |
|           |  | H7  | hc | 0.0544  |
|           |  | C7  | ci | -0.3501 |
|           |  | H8  | hc | 0.0544  |
|           |  | H9  | hc | 0.0544  |
|           |  | H10 | hc | 0.0544  |
|           |  | O   | oi | -0.8177 |
|           |  | H11 | ho | 0.4140  |
|           |  | C1  | ca | -0.0800 |
|           |  | H   | ha | 0.1375  |
|           |  | C2  | ca | -0.1465 |
|           |  | H1  | ha | 0.1300  |
|           |  | C3  | ca | -0.1070 |
|           |  | H2  | ha | 0.1290  |
|           |  | C4  | ca | -0.1465 |
|           |  | H3  | ha | 0.1300  |
|           |  | C5  | ca | -0.0800 |
|           |  | H4  | ha | 0.1375  |

|           |                                                                                     |         |    |         |
|-----------|-------------------------------------------------------------------------------------|---------|----|---------|
| <b>18</b> | 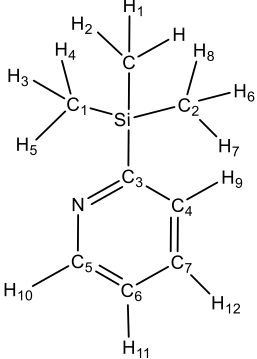   | C       | ci | -0.3041 |
|           |                                                                                     | H       | hc | 0.0507  |
|           |                                                                                     | H1      | hc | 0.0507  |
|           |                                                                                     | H2      | hc | 0.0507  |
|           |                                                                                     | Si      | si | 0.8780  |
|           |                                                                                     | C1      | ci | -0.3041 |
|           |                                                                                     | H3      | hc | 0.0507  |
|           |                                                                                     | H4      | hc | 0.0507  |
|           |                                                                                     | H5      | hc | 0.0507  |
|           |                                                                                     | C2      | ci | -0.3041 |
|           |                                                                                     | H6      | hc | 0.0507  |
|           |                                                                                     | H7      | hc | 0.0507  |
|           |                                                                                     | H8      | hc | 0.0507  |
|           |                                                                                     | C3      | ca | -0.0367 |
|           |                                                                                     | N       | nb | -0.6450 |
|           |                                                                                     | C5      | ca | 0.3802  |
|           |                                                                                     | C6      | ca | -0.2323 |
| H11       | ha                                                                                  | 0.1400  |    |         |
| H10       | h4                                                                                  | 0.0181  |    |         |
| C4        | ca                                                                                  | -0.2163 |    |         |
| H9        | ha                                                                                  | 0.1410  |    |         |
| C7        | ca                                                                                  | -0.1040 |    |         |
| H12       | ha                                                                                  | 0.1350  |    |         |
| <b>19</b> |   | C       | ci | -0.3024 |
|           |                                                                                     | H       | hc | 0.0485  |
|           |                                                                                     | H1      | hc | 0.0485  |
|           |                                                                                     | H2      | hc | 0.0485  |
|           |                                                                                     | Si      | si | 0.8980  |
|           |                                                                                     | C1      | ci | -0.3024 |
|           |                                                                                     | H3      | hc | 0.0485  |
|           |                                                                                     | H4      | hc | 0.0485  |
|           |                                                                                     | H5      | hc | 0.0485  |
|           |                                                                                     | C2      | ci | -0.3024 |
|           |                                                                                     | H6      | hc | 0.0485  |
|           |                                                                                     | H7      | hc | 0.0485  |
|           |                                                                                     | H8      | hc | 0.0485  |
|           |                                                                                     | C3      | cc | -0.1387 |
|           |                                                                                     | N1      | nd | -0.4908 |
|           |                                                                                     | N       | na | -0.0206 |
|           |                                                                                     | H9      | hn | 0.3157  |
| C4        | cc                                                                                  | -0.2653 |    |         |
| H10       | ha                                                                                  | 0.1630  |    |         |
| C5        | cd                                                                                  | -0.1623 |    |         |
| H11       | h4                                                                                  | 0.1730  |    |         |
| <b>20</b> |  | C       | c3 | -0.1761 |
|           |                                                                                     | H       | hc | 0.0637  |
|           |                                                                                     | H1      | hc | 0.0637  |
|           |                                                                                     | H2      | hc | 0.0637  |
|           |                                                                                     | C1      | c  | 0.6411  |
|           |                                                                                     | O       | o  | -0.6041 |

|  |     |    |         |
|--|-----|----|---------|
|  | N   | n  | -0.5439 |
|  | H3  | hn | 0.2965  |
|  | C2  | ci | -0.1040 |
|  | H4  | h1 | 0.0592  |
|  | H5  | h1 | 0.0592  |
|  | Si  | si | 0.6270  |
|  | C4  | ci | -0.3004 |
|  | H9  | hc | 0.0506  |
|  | H10 | hc | 0.0506  |
|  | H11 | hc | 0.0506  |
|  | C5  | ci | -0.3004 |
|  | H12 | hc | 0.0506  |
|  | H13 | hc | 0.0506  |
|  | H14 | hc | 0.0506  |
|  | C3  | ci | -0.3004 |
|  | H6  | hc | 0.0506  |
|  | H7  | hc | 0.0506  |
|  | H8  | hc | 0.0506  |

**Table S11.** AM1-BCC charges of the compounds in protein-ligand MD simulations.

| Comp.                                                                                         | Atom type                                                                                     | Charge | Atom type      | Charge    |     |           |           |
|-----------------------------------------------------------------------------------------------|-----------------------------------------------------------------------------------------------|--------|----------------|-----------|-----|-----------|-----------|
|                                                                                               | <b>21(C)</b>                                                                                  |        | <b>22 (Si)</b> |           |     |           |           |
| 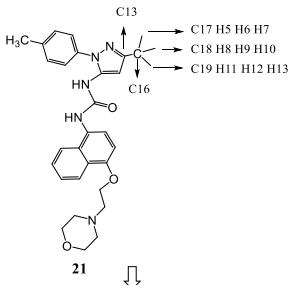 <p>21</p> | C13                                                                                           | cd     | 0.334600       | C13       | cd  | 0.334600  |           |
|                                                                                               | C14                                                                                           | cd     | -0.271300      | C14       | cd  | -0.271300 |           |
|                                                                                               | H4                                                                                            | ha     | 0.190000       | H4        | ha  | 0.190000  |           |
|                                                                                               | C16                                                                                           | c3     | -0.076300      | Si        | si  | 0.795677  |           |
|                                                                                               | C17                                                                                           | c3     | -0.085100      | C17       | ci  | -0.407091 |           |
|                                                                                               |  <p>22</p> | H5     | hc             | 0.039256  | H5  | hc        | 0.049700  |
|                                                                                               |                                                                                               | H6     | hc             | 0.039256  | H6  | hc        | 0.049700  |
|                                                                                               |                                                                                               | H7     | hc             | 0.039256  | H7  | hc        | 0.049700  |
|                                                                                               |                                                                                               | C18    | c3             | -0.085100 | C18 | ci        | -0.407091 |
|                                                                                               |                                                                                               | H8     | hc             | 0.039256  | H8  | hc        | 0.049700  |
| H9                                                                                            |                                                                                               | hc     | 0.039256       | H9        | hc  | 0.049700  |           |
|                                                                                               | H10                                                                                           | hc     | 0.039256       | H10       | hc  | 0.049700  |           |

|     |    |           |     |    |           |
|-----|----|-----------|-----|----|-----------|
| C19 | c3 | -0.085100 | C19 | ci | -0.407091 |
| H11 | hc | 0.039256  | H11 | hc | 0.049700  |
| H12 | hc | 0.039256  | H12 | hc | 0.049700  |
| H13 | hc | 0.039256  | H13 | hc | 0.049700  |

| <b>23(C)</b>                                                                        |     |    | <b>24(Si)</b> |     |    |           |
|-------------------------------------------------------------------------------------|-----|----|---------------|-----|----|-----------|
| 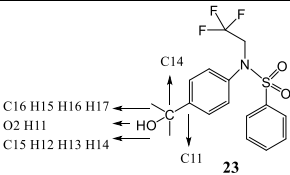   | C11 | ca | -0.068300     | C11 | ca | -0.068300 |
|                                                                                     | C14 | c3 | 0.197100      | Si  | si | 0.903925  |
|                                                                                     | O2  | oh | -0.601800     | O2  | oi | -0.859675 |
|                                                                                     | H11 | ho | 0.405000      | H11 | ho | 0.415000  |
|    | C15 | c3 | -0.120600     | C15 | ci | -0.383075 |
|                                                                                     | H12 | hc | 0.046867      | H12 | hc | 0.057867  |
|                                                                                     | H13 | hc | 0.046867      | H13 | hc | 0.057867  |
|                                                                                     | H14 | hc | 0.046867      | H14 | hc | 0.057867  |
|                                                                                     | C16 | c3 | -0.120600     | C16 | ci | -0.383075 |
|                                                                                     | H15 | hc | 0.046867      | H15 | hc | 0.057867  |
|                                                                                     | H16 | hc | 0.046867      | H16 | hc | 0.057867  |
|                                                                                     | H17 | hc | 0.046867      | H17 | hc | 0.057867  |
| <b>25(C)</b>                                                                        |     |    | <b>26(Si)</b> |     |    |           |
|  | O3  | oh | -0.605100     | N1  | n  | -0.595951 |
|                                                                                     | H15 | ho | 0.444000      | H79 | hn | 0.307500  |
|                                                                                     |     |    |               | C19 | ci | -0.170051 |
|                                                                                     |     |    |               | Si  | si | 0.626000  |
|  |     |    |               | C20 | ci | -0.299767 |
|                                                                                     |     |    |               | H18 | hc | 0.050367  |
|                                                                                     |     |    |               | H19 | hc | 0.050367  |
|                                                                                     |     |    |               | H20 | hc | 0.050367  |
|                                                                                     |     |    |               | C21 | ci | -0.299767 |
|                                                                                     |     |    |               | H21 | hc | 0.050367  |

|     |    |           |
|-----|----|-----------|
| H22 | hc | 0.050367  |
| H23 | hc | 0.050367  |
| C22 | ci | -0.299767 |
| H24 | hc | 0.050367  |
| H25 | hc | 0.050367  |
| H26 | hc | 0.050367  |
| H16 | h1 | 0.058700  |
| H17 | h1 | 0.058700  |

|           | 26(Si) |    |           | 27(Si) |    |           |
|-----------|--------|----|-----------|--------|----|-----------|
| <p>26</p> | C19    | ci | -0.106000 | N1     | n  | -0.531900 |
|           | H16    | h1 | 0.058700  | C19    | c3 | 0.091000  |
|           | H17    | h1 | 0.058700  | H16    | h1 | 0.058700  |
|           | Si     | si | 0.626000  | H17    | h1 | 0.058700  |
|           | C20    | ci | -0.299767 | C30    | c3 | -0.080400 |
|           | H18    | hc | 0.050367  | C31    | ci | -0.296393 |
|           | H19    | hc | 0.050367  | Si     | si | 0.620000  |
|           | H20    | hc | 0.050367  | C32    | ci | -0.295767 |
|           | C21    | ci | -0.299767 | H32    | hc | 0.048144  |
|           | H21    | hc | 0.050367  | H33    | hc | 0.048144  |
| <p>27</p> | H22    | hc | 0.050367  | H34    | hc | 0.048144  |
|           | H23    | hc | 0.050367  | C33    | ci | -0.295767 |
|           | C22    | ci | -0.299767 | H35    | hc | 0.048144  |
|           | H24    | hc | 0.050367  | H36    | hc | 0.048144  |
|           | H25    | hc | 0.050367  | H37    | hc | 0.048144  |
|           | H26    | hc | 0.050367  | C34    | ci | -0.295767 |
|           |        |    |           | H38    | hc | 0.048144  |
|           |        |    |           | H39    | hc | 0.048144  |
|           |        |    |           | H40    | hc | 0.048144  |

|     |    |          |
|-----|----|----------|
| H30 | hc | 0.056200 |
| H31 | hc | 0.056200 |
| H48 | hc | 0.040700 |
| H49 | hc | 0.040700 |

| 31(C) |  |  | 32(Si) |  |  |
|-------|--|--|--------|--|--|
|-------|--|--|--------|--|--|

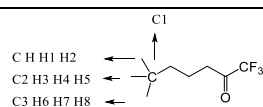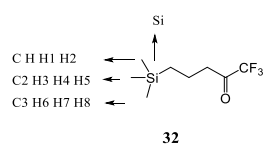

|    |    |           |    |    |           |
|----|----|-----------|----|----|-----------|
| C  | c3 | -0.088433 | C  | ci | -0.297767 |
| H  | hc | 0.036033  | H  | hc | 0.049811  |
| H1 | hc | 0.036033  | H1 | hc | 0.049811  |
| H2 | hc | 0.036033  | H2 | hc | 0.049811  |
| C1 | c3 | -0.056000 | Si | si | 0.626000  |
| C2 | c3 | -0.088433 | C2 | ci | -0.297767 |
| H3 | hc | 0.036033  | H3 | hc | 0.049811  |
| H4 | hc | 0.036033  | H4 | hc | 0.049811  |
| H5 | hc | 0.036033  | H5 | hc | 0.049811  |
| C3 | c3 | -0.088433 | C3 | ci | -0.297767 |
| H6 | hc | 0.036033  | H6 | hc | 0.049811  |
| H7 | hc | 0.036033  | H7 | hc | 0.049811  |
| H8 | hc | 0.036033  | H8 | hc | 0.049811  |

| 33(C) |  |  | 33(Si) |  |  |
|-------|--|--|--------|--|--|
|-------|--|--|--------|--|--|

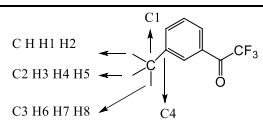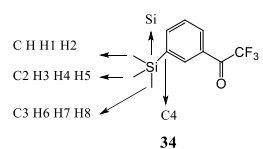

|    |    |           |    |    |           |
|----|----|-----------|----|----|-----------|
| C  | c3 | -0.088767 | C  | ci | -0.330492 |
| H  | hc | 0.040144  | H  | hc | 0.051033  |
| H1 | hc | 0.040144  | H1 | hc | 0.051033  |
| H2 | hc | 0.040144  | H2 | hc | 0.051033  |
| C1 | c3 | -0.010700 | Si | si | 0.616474  |
| C2 | c3 | -0.088767 | C2 | ci | -0.330492 |
| H3 | hc | 0.040144  | H3 | hc | 0.051033  |
| H4 | hc | 0.040144  | H4 | hc | 0.051033  |
| H5 | hc | 0.040144  | H5 | hc | 0.051033  |

|    |    |           |    |    |           |
|----|----|-----------|----|----|-----------|
| C3 | c3 | -0.088767 | C3 | ci | -0.330492 |
| H6 | hc | 0.040144  | H6 | hc | 0.051033  |
| H7 | hc | 0.040144  | H7 | hc | 0.051033  |
| H8 | hc | 0.040144  | H8 | hc | 0.051033  |

---

## References

1. Barnes, M. J.; Conroy, R.; Miller, D. J.; Mills, J. S.; Montana, J. G.; Pooni, P. K.; Showell, G. A.; Walsh, L. M.; Warneck, J. B., Trimethylsilylpyrazoles as novel inhibitors of p38 MAP kinase: a new use of silicon bioisosteres in medicinal chemistry. *Bioorg Med Chem Lett* **2007**,*17* (2), 354-7.
2. Regan, J.; Breitfelder, S.; Cirillo, P.; Gilmore, T.; Graham, A. G.; Hickey, E.; Klaus, B.; Madwed, J.; Moriak, M.; Moss, N.; Pargellis, C.; Pav, S.; Proto, A.; Swinamer, A.; Tong, L.; Torcellini, C., Pyrazole Urea-Based Inhibitors of p38 MAP Kinase: From Lead Compound to Clinical Candidate. *Journal of Medicinal Chemistry* **2002**,*45* (14), 2994-3008.
3. Toyama, H.; Shirakawa, H.; Komai, M.; Hashimoto, Y.; Fujii, S., Development of novel silanol-based human pregnane X receptor (PXR) agonists with improved receptor selectivity. *Bioorg Med Chem* **2018**,*26* (15), 4493-4501.
4. Gately, S.; West, R., Novel therapeutics with enhanced biological activity generated by the strategic introduction of silicon isosteres into known drug scaffolds. *Drug Development Research* **2007**,*68* (4), 156-163.
5. Kalgutkar, A. S.; Marnett, A. B.; Crews, B. C.; Rimmel, R. P.; Marnett, L. J., Ester and Amide Derivatives of the Nonsteroidal Antiinflammatory Drug, Indomethacin, as Selective Cyclooxygenase-2 Inhibitors. *Journal of Medicinal Chemistry* **2000**,*43* (15), 2860-2870.
6. Allen, K. N.; Abeles, R. H., Inhibition kinetics of acetylcholinesterase with fluoromethyl ketones. *Biochemistry* **1989**,*28* (21), 8466-8473.
7. Hornsperger, J.-M.; Collard, J.-N.; Heydt, J.-G.; Giacobini, E.; Funes, S.; Dow, J.; Schirlin, D., Trimethylsilylated trifluoromethyl ketones, a novel class of acetylcholinesterase inhibitors: biochemical and pharmacological profile of MDL 73,745. *Biochemical Society Transactions* **1994**,*22* (3), 758-763.
8. Jollymore-Hughes, C. T.; Pottie, I. R.; Martin, E.; Rosenberry, T. L.; Darvesh, S., Development of acetophenone ligands as potential neuroimaging agents for cholinesterases. *Bioorganic & Medicinal Chemistry* **2016**,*24* (21), 5270-5279.
